# Supplementary material
Source: PubMed Central journal article supplement (PMC4176200)
Supplement: supp_M114.568964_jbc.M114.568964-1.pdf [file supp_M114.568964_jbc.M114.568964-1.pdf]

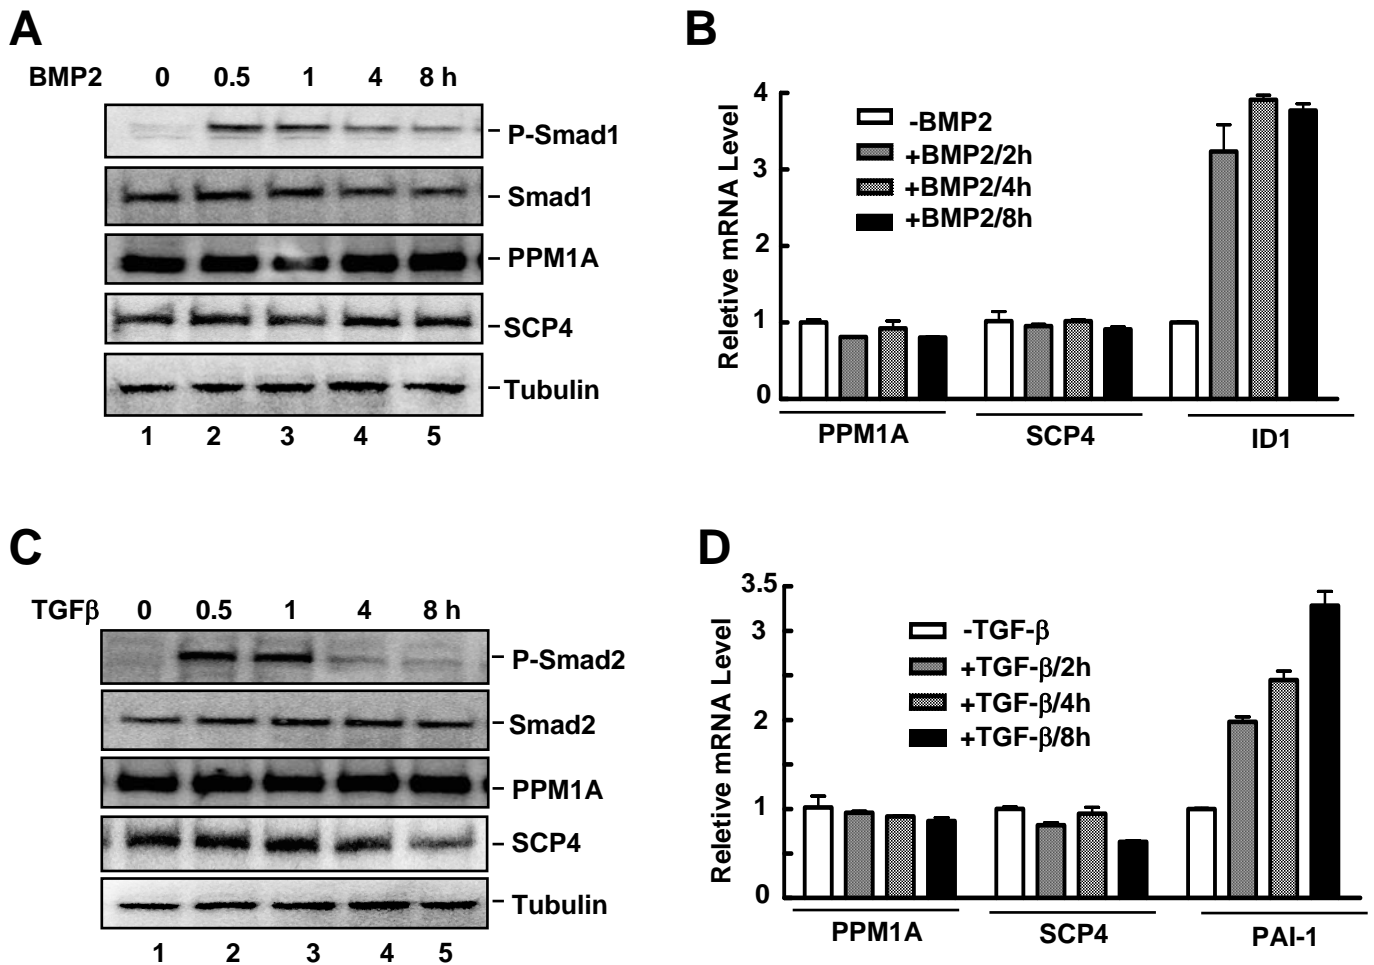

**Supplementary Figure 1. BMP2 and TGF- $\beta$  do not regulate the expression of SCP4 and PPM1A.**

A. BMP2 does not alter SCP4 or PPM1A expression. C2C12 cells were treated with BMP2 for indicated time periods, and the harvested for Western blotting analysis.

B. BMP2 induces mRNA level of Id1, but not that of SCP4 or PPM1A. C2C12 cells were treated with BMP2 for indicated time periods, and total RNAs were isolated for qRT-PCR analysis.

C. TGF- $\beta$  does not alter SCP4 or PPM1A expression. HaCaT cells were treated with TGF- $\beta$  for indicated time periods, and the harvested for Western blotting analysis.

D. TGF- $\beta$  induces mRNA level of PAI-1, but not that of SCP4 or PPM1A. HaCaT cells were treated with TGF- $\beta$  for indicated time periods, and total RNAs were isolated for qRT-PCR analysis.
